# Supplementary figures and images for: Homeodomain-interacting protein kinase maintains neuronal homeostasis during normal Caenorhabditis elegans aging and systemically regulates longevity from serotonergic and GABAergic neurons
Source: eLife journal article supplement (doi:10.7554/elife.85792), 2023-06-20

**A**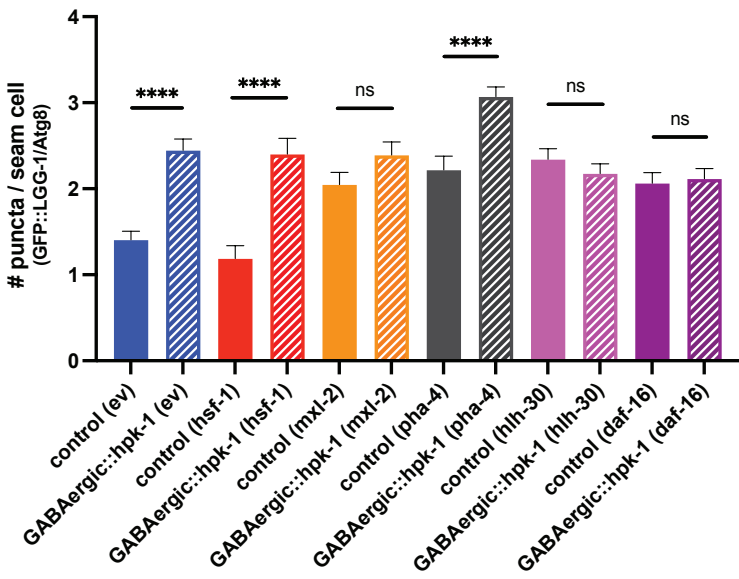**B**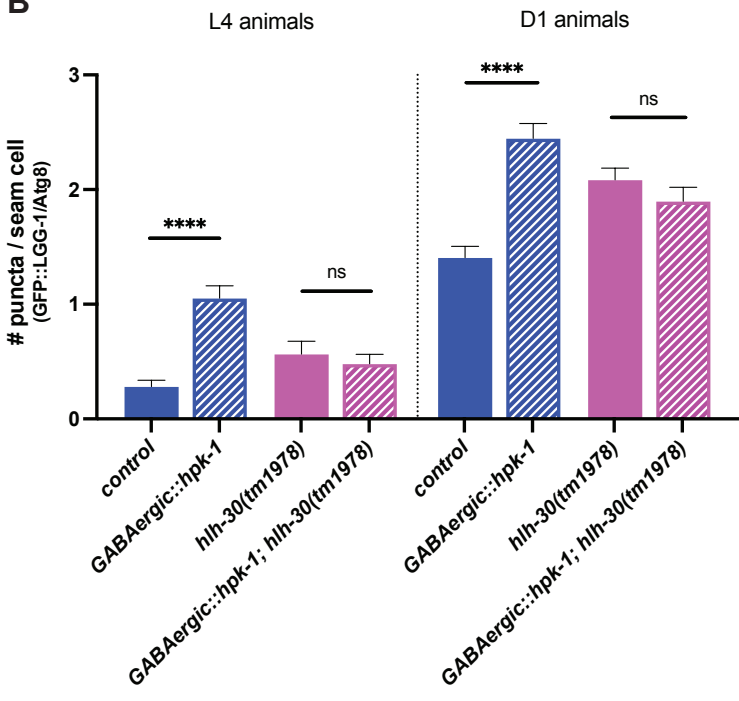

Supplement: supp [file elife-85792-supp-v2.zip]

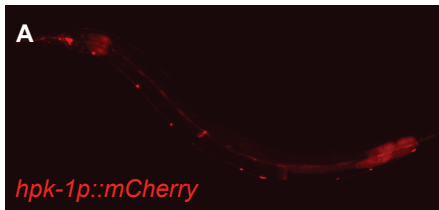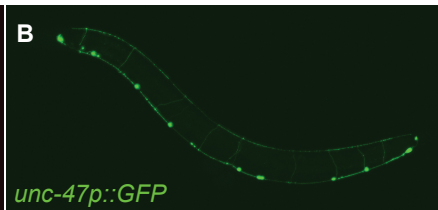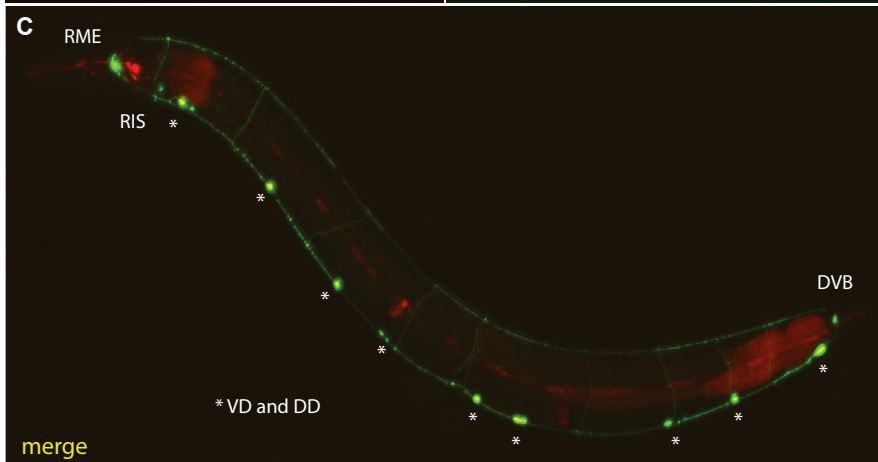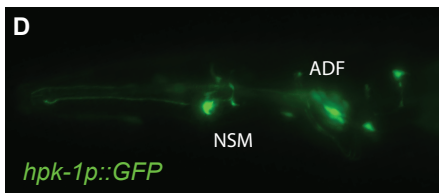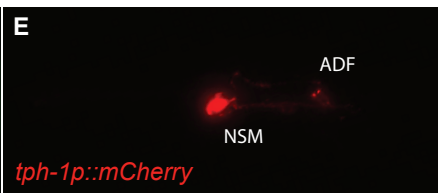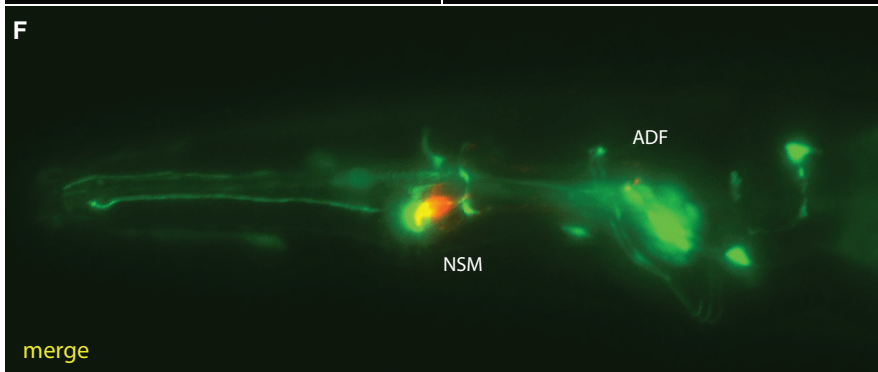

Supplement: supp [file elife-85792-supp-v2.zip]

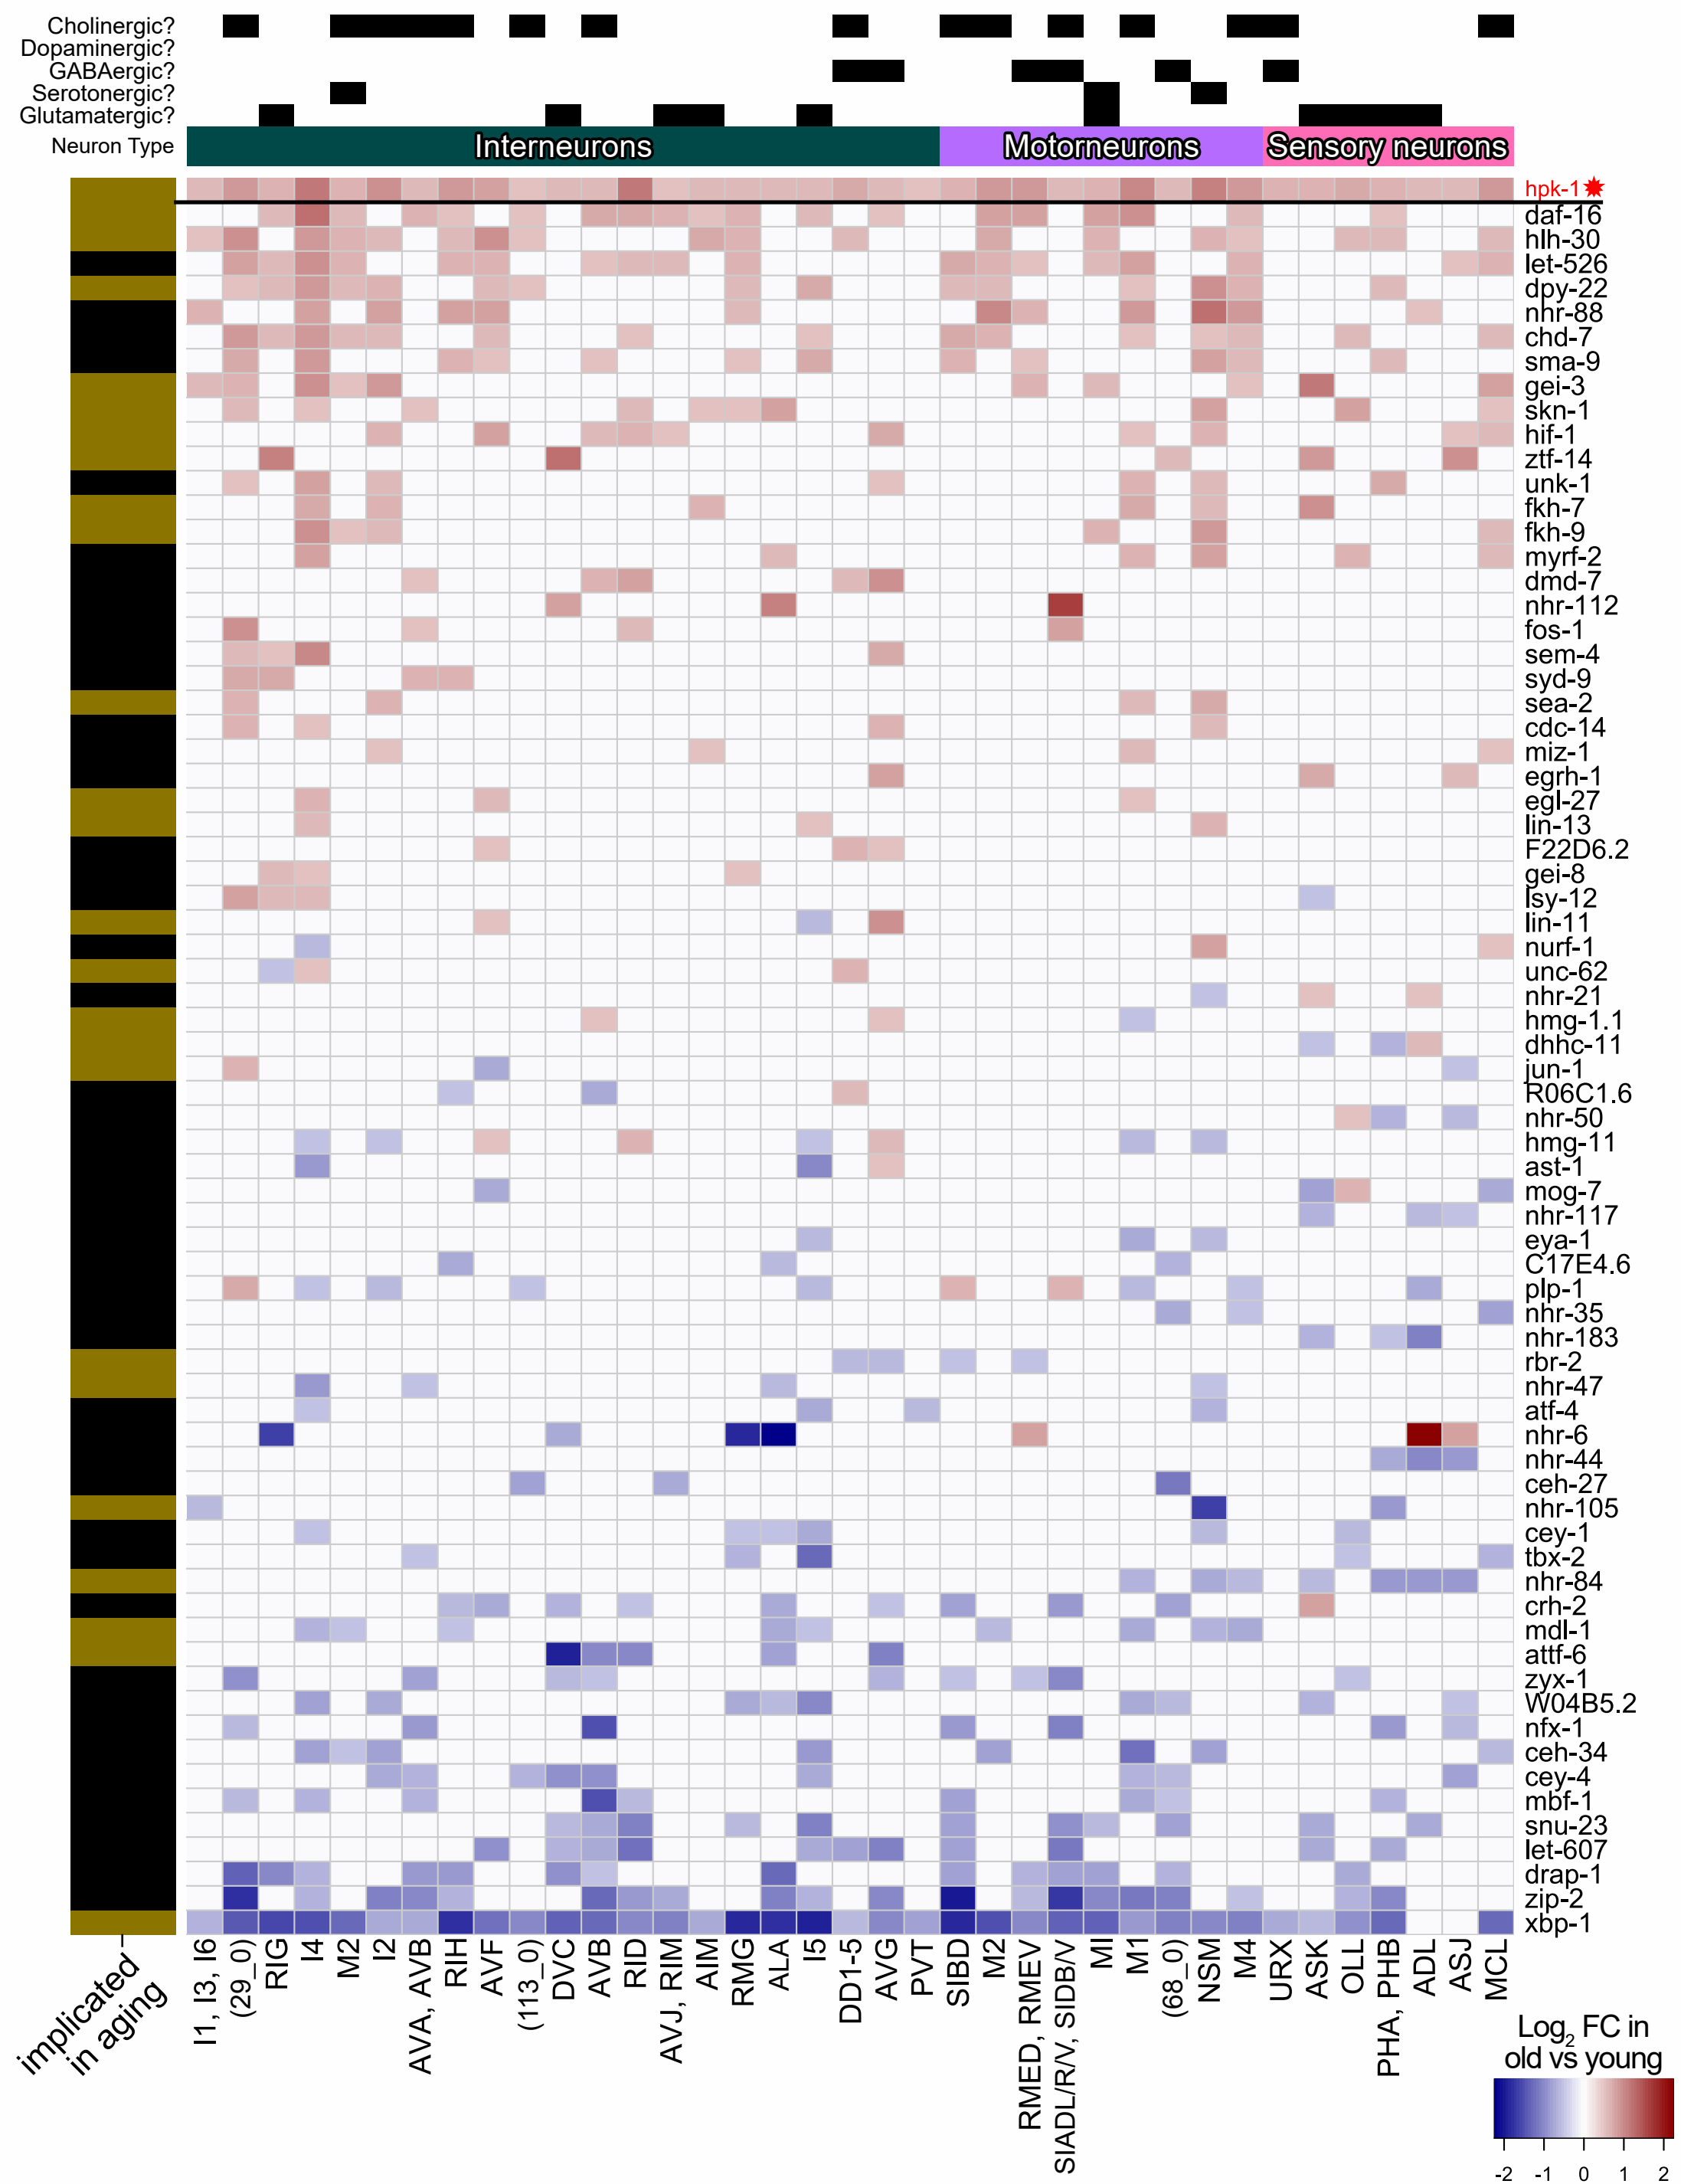

Supplement: supp [file elife-85792-supp-v2.zip]

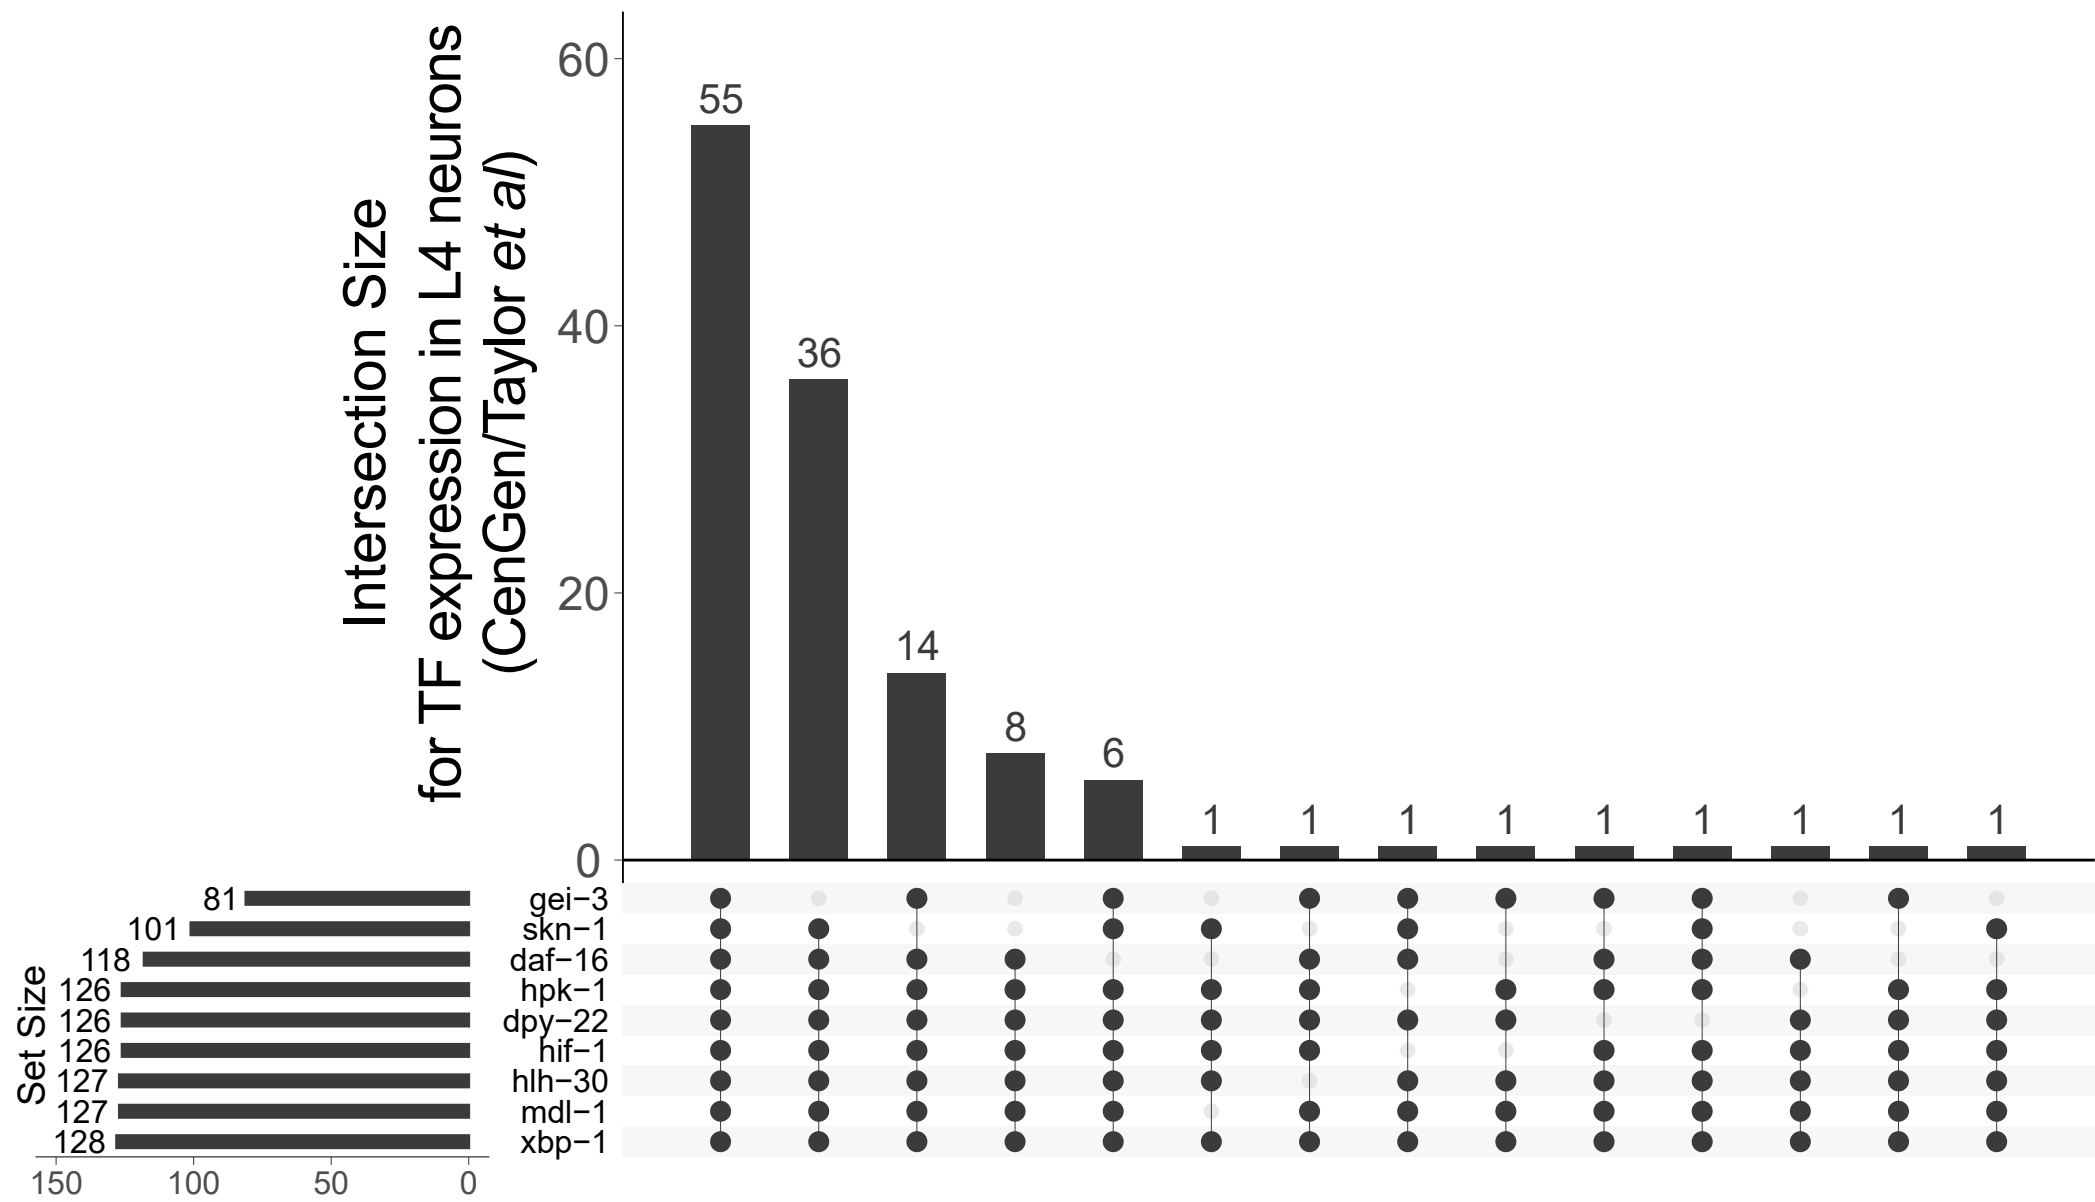

Supplement: supp [file elife-85792-supp-v2.zip]

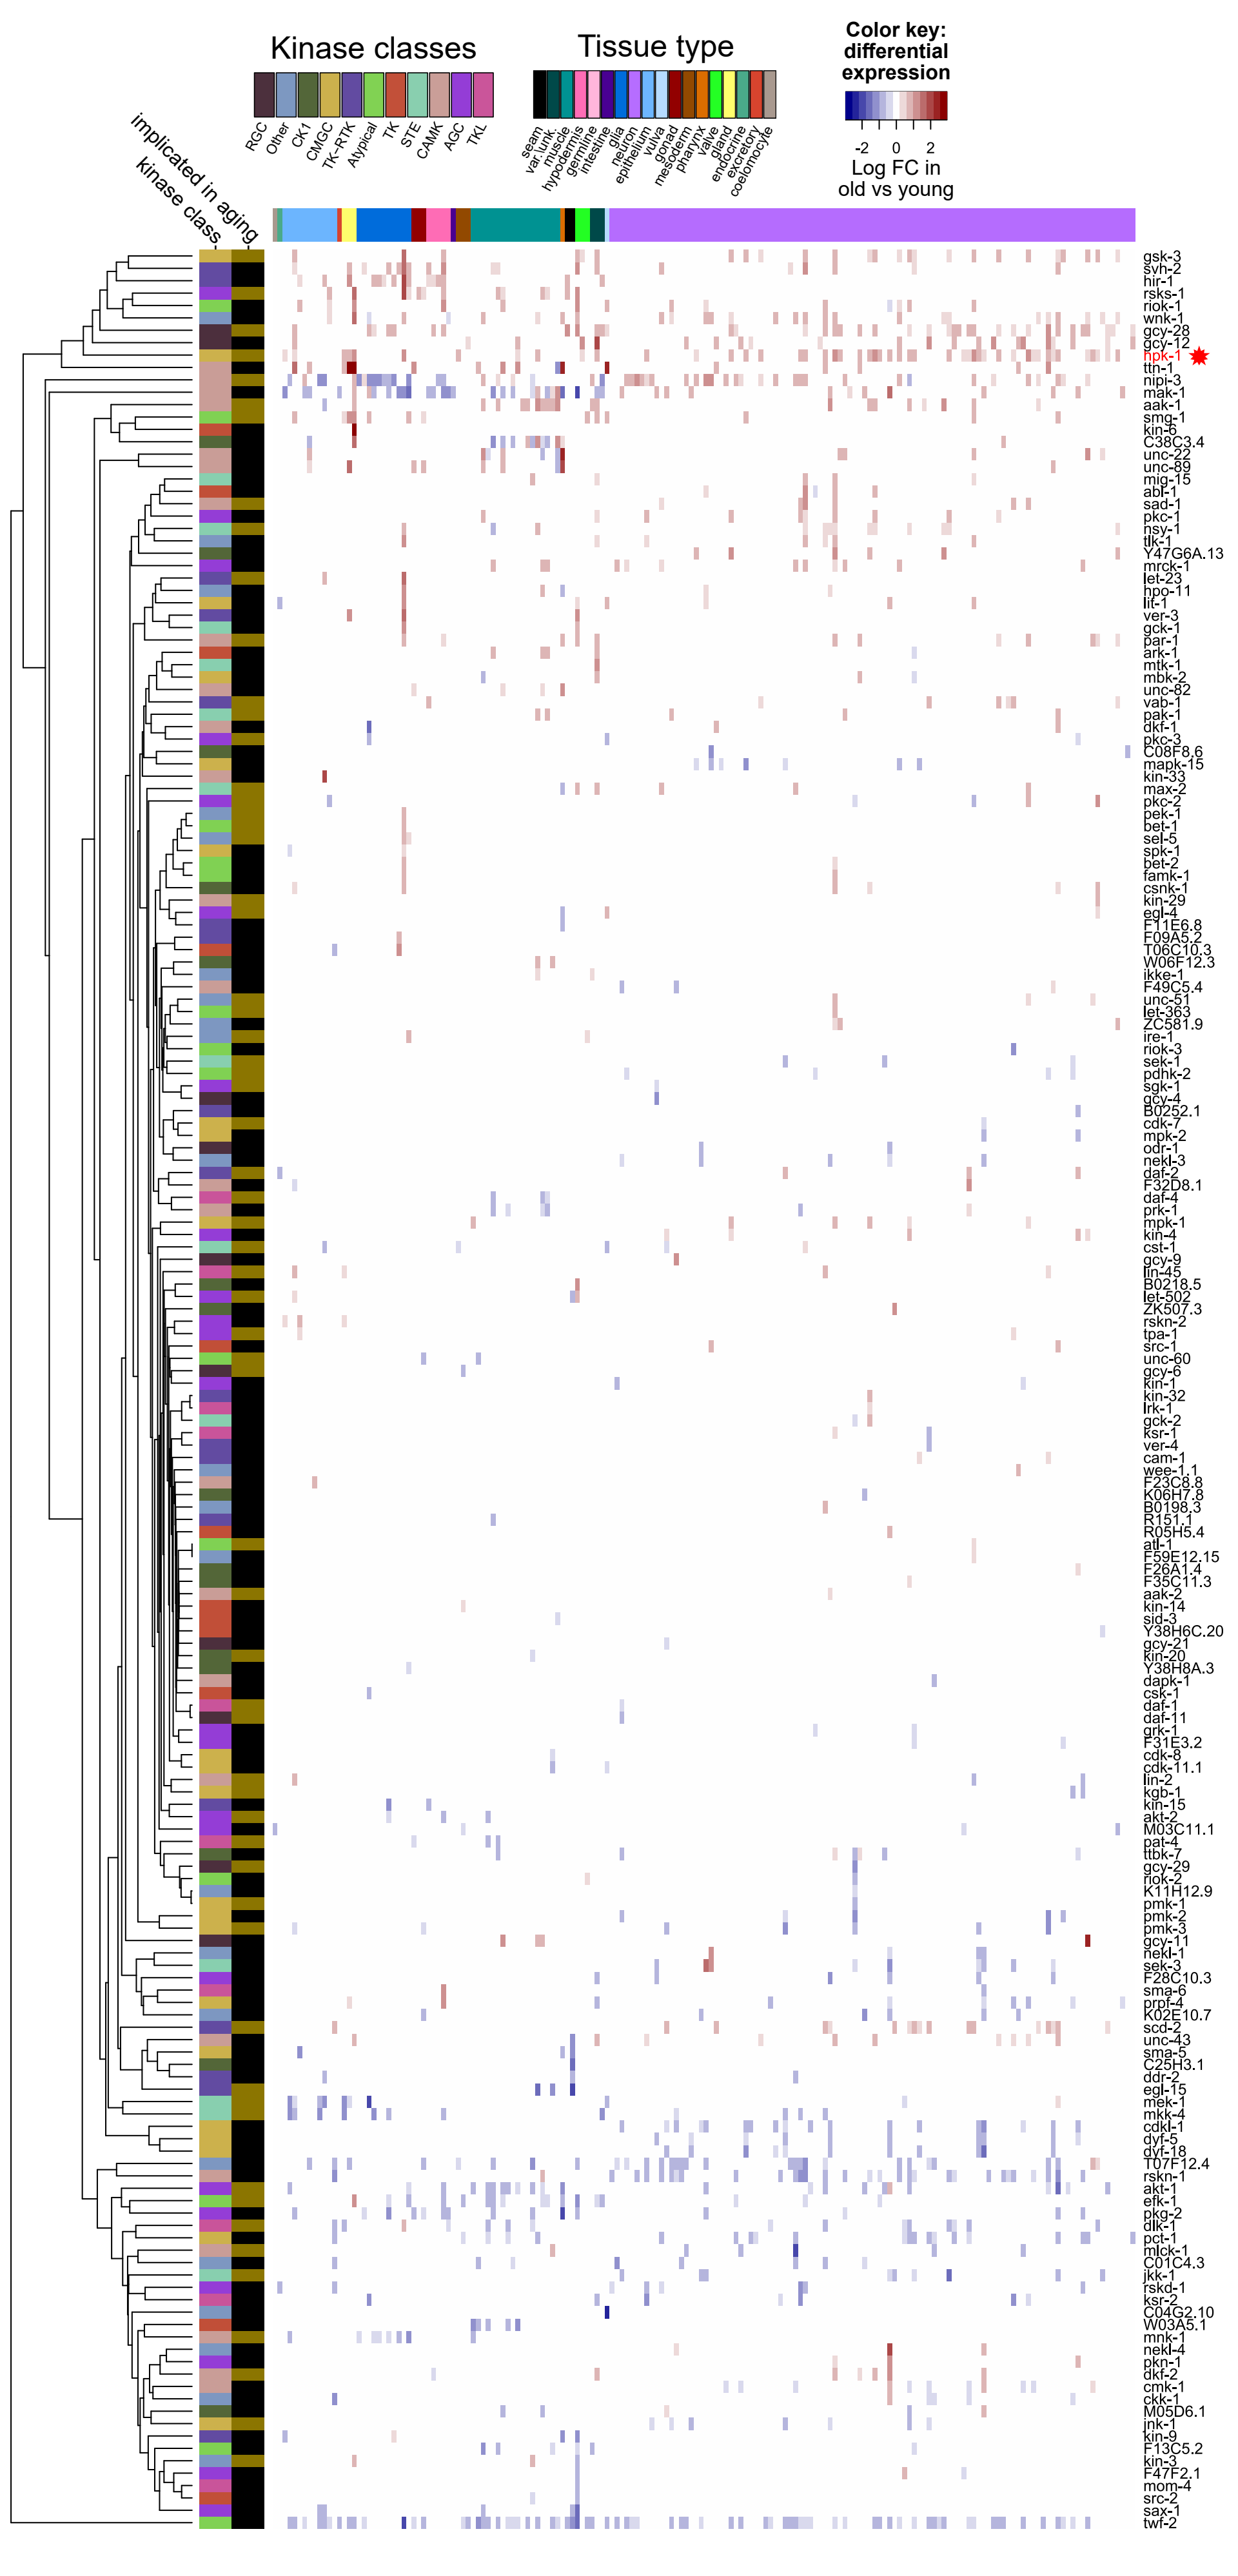

Supplement: supp [file elife-85792-supp-v2.zip]

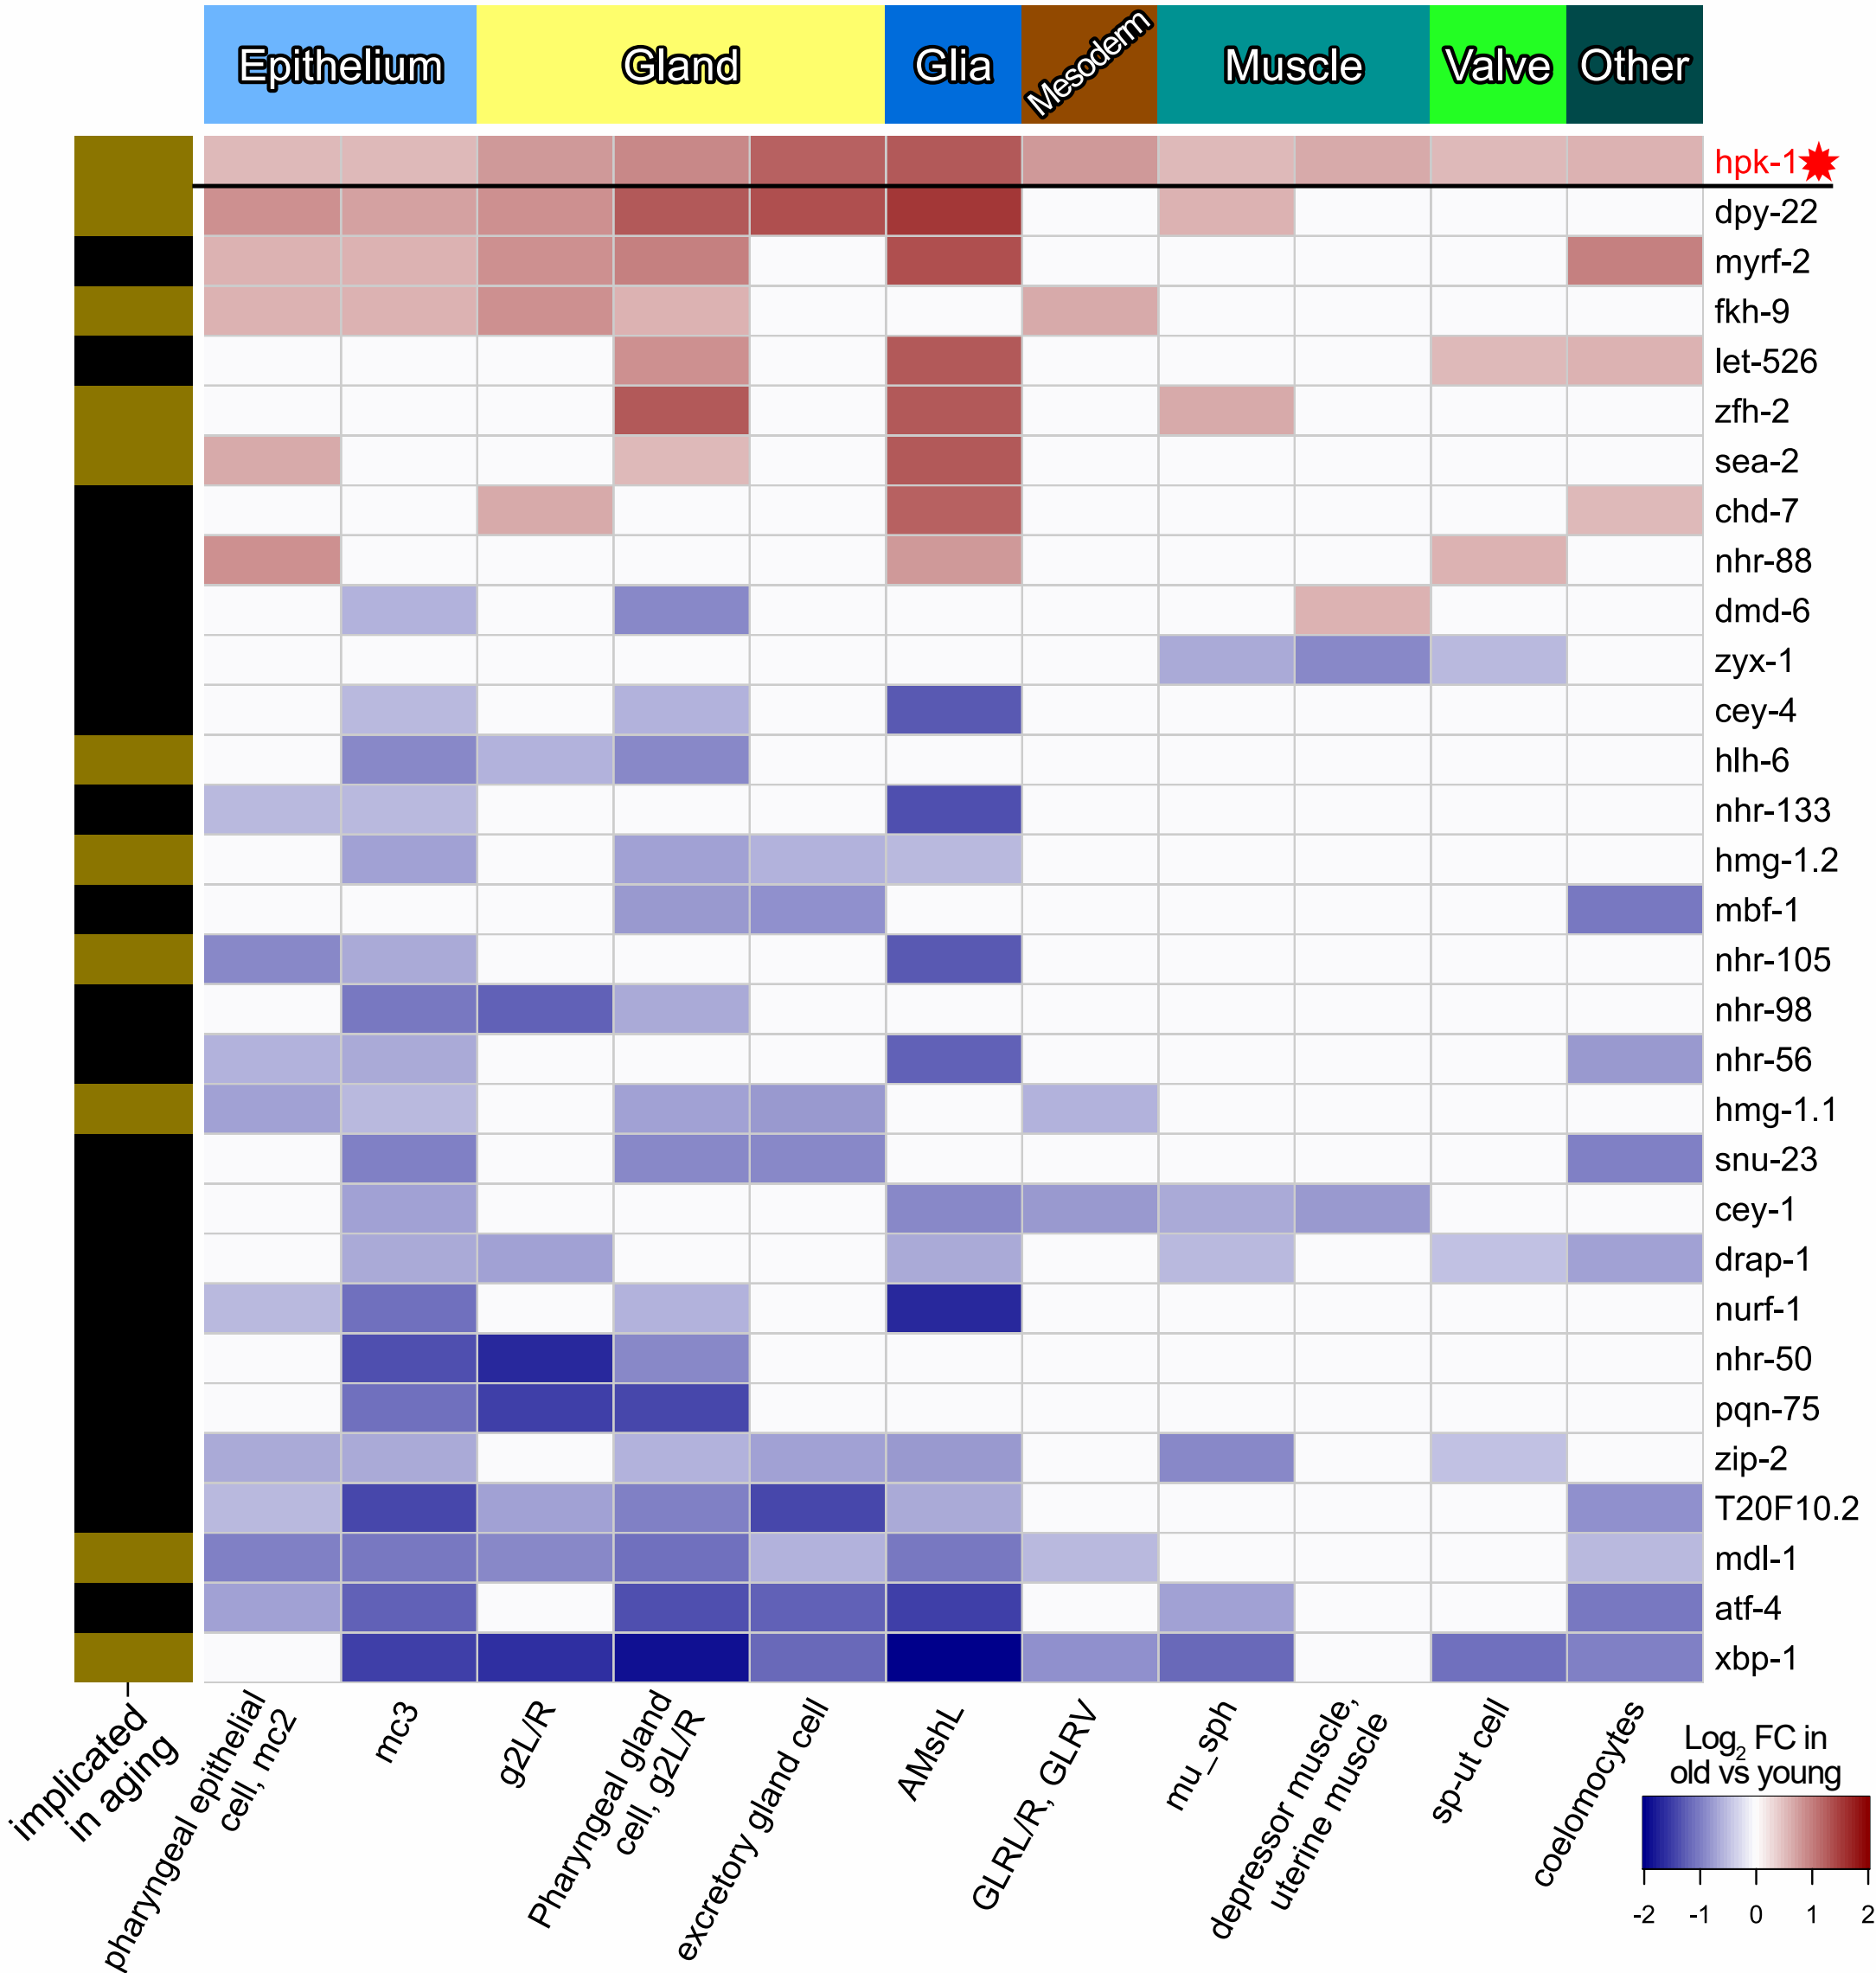

Supplement: supp [file elife-85792-supp-v2.zip]

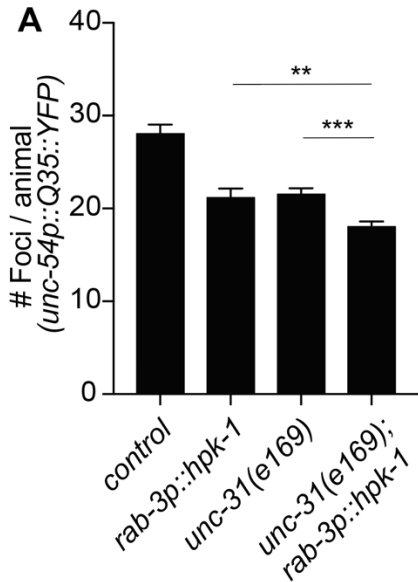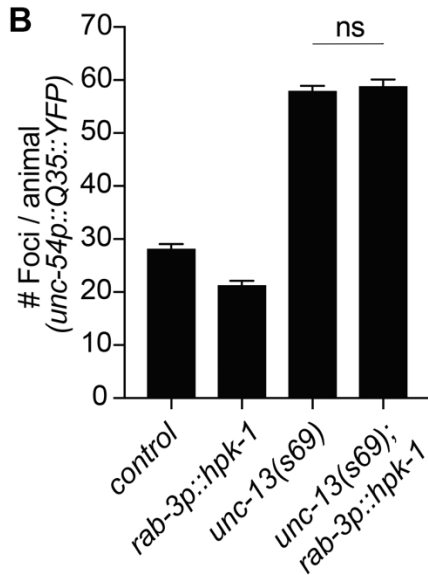

Supplement: supp [file elife-85792-supp-v2.zip]

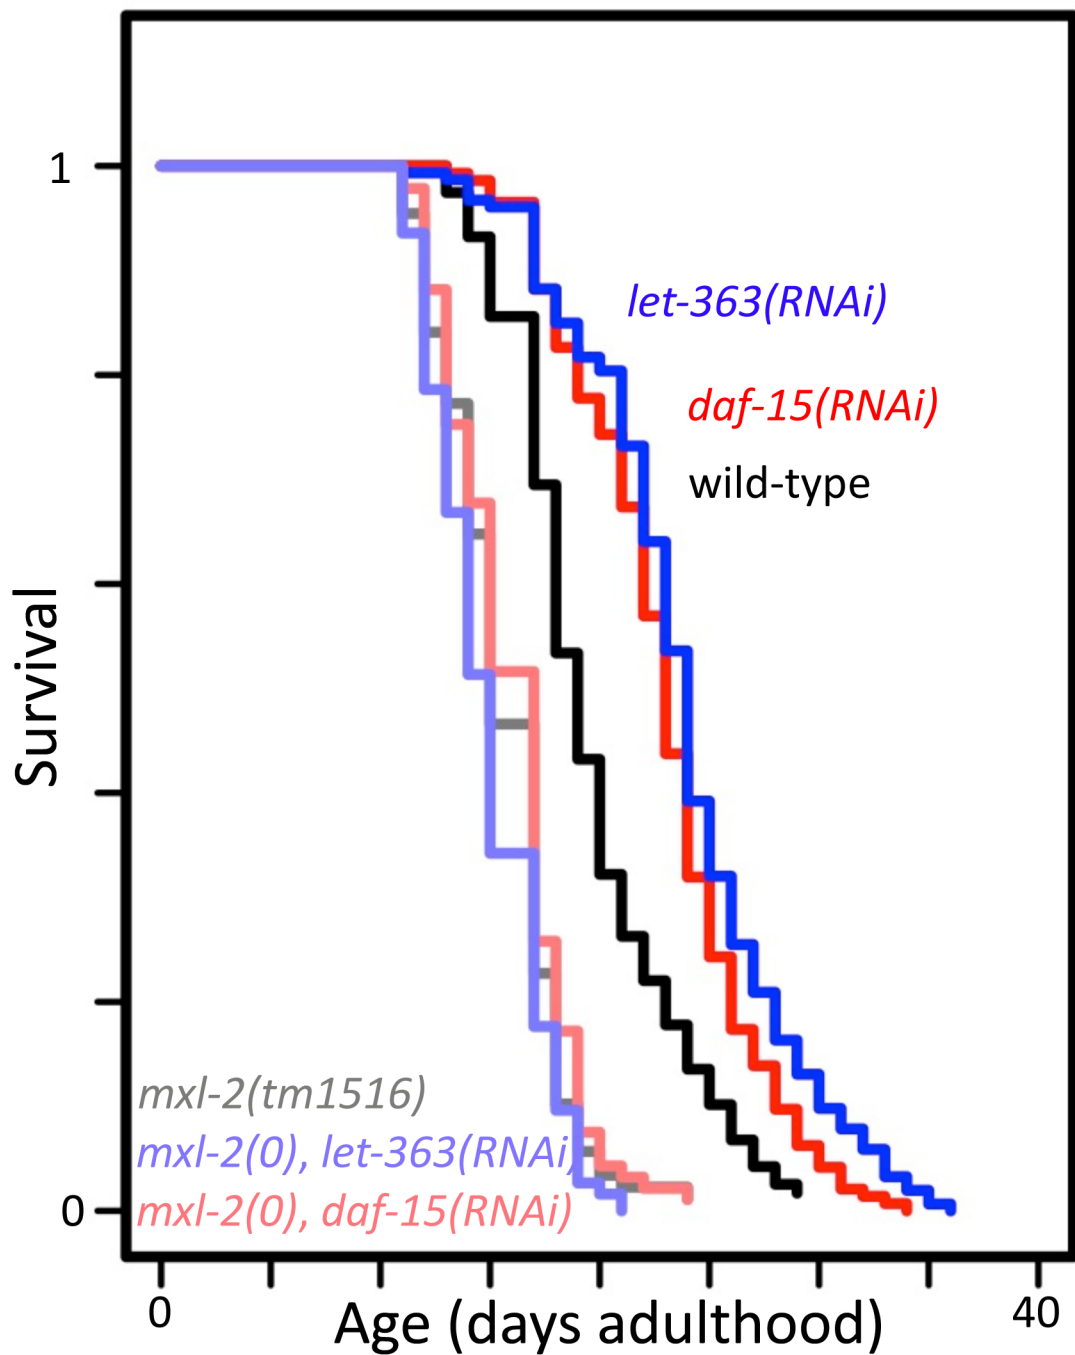

Supplement: supp [file elife-85792-supp-v2.zip]

**A**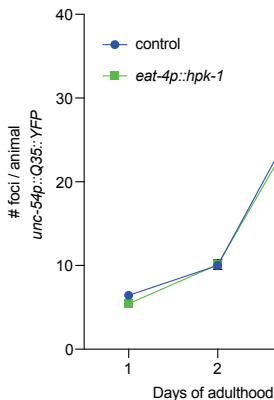**B**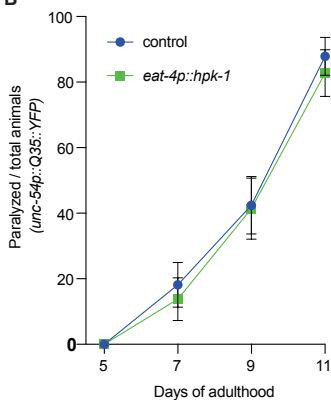**C**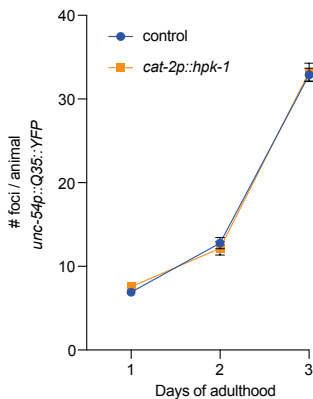**D**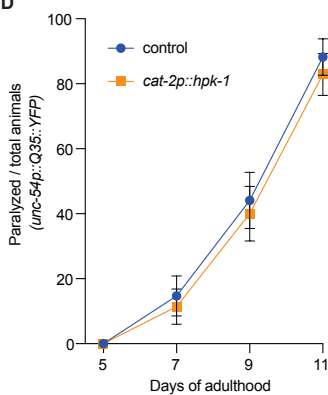

Supplement: supp [file elife-85792-supp-v2.zip]
